# Supplementary material for: Novel Fe2.55Sb2alloy nanoparticles incorporated in N-doped carbon as a bifunctional oxygen electrocatalyst for rechargeable Zn–air batteries
Source: Royal Society of Chemistry journal article supplement (doi:10.1039/d2nj01697d), 2022-01-01
Supplement: d2nj01697d1.pdf [file d2nj01697d1.pdf]

## Supporting Information

### **Novel Fe<sub>2.55</sub>Sb<sub>2</sub> Alloy Nanoparticles incorporated in N-doped Carbon as Bifunctional Oxygen Electrocatalyst for Rechargeable Zn-Air Battery**

Xing Xie<sup>a</sup>, Panpan Sun<sup>a,c\*</sup>, Weitao Liu<sup>a</sup>, Tao Gong<sup>a</sup>, Xiaowei Lv<sup>a,c</sup>, Liang Fang<sup>b</sup>, Yongan Wei<sup>a\*</sup>, Xiaohua Sun<sup>a,c\*</sup>

*a College of Materials and Chemical Engineering, Key Laboratory of Inorganic Nonmetallic Crystalline and Energy Conversion Materials, China Three Gorges University, Yichang 443002, China.*

*b Guangxi Key Laboratory of Optical and Electronic Materials and Devices, Guilin University of Technology, Guilin 541004, China.*

*c Hubei Three Gorges Laboratory, Yichang, Hubei 443007.*

\*Corresponding author. E-mail:

[sunpp705@nenu.edu.cn](mailto:sunpp705@nenu.edu.cn). [weiya605@nenu.edu.cn](mailto:weiya605@nenu.edu.cn). [mksxh@163.com](mailto:mksxh@163.com).

To be published in New Journal of Chemistry

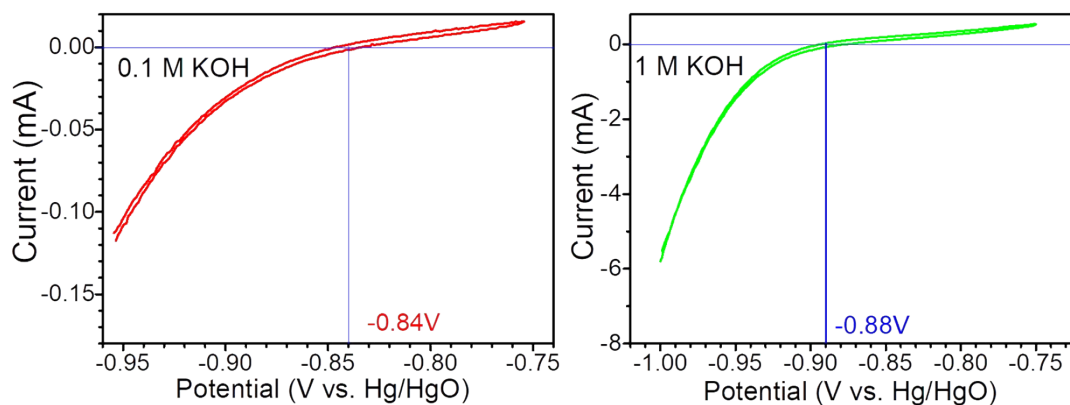

Fig. S1. Calibration of Hg/HgO reference electrode with respect to reversible hydrogen electrode (RHE).

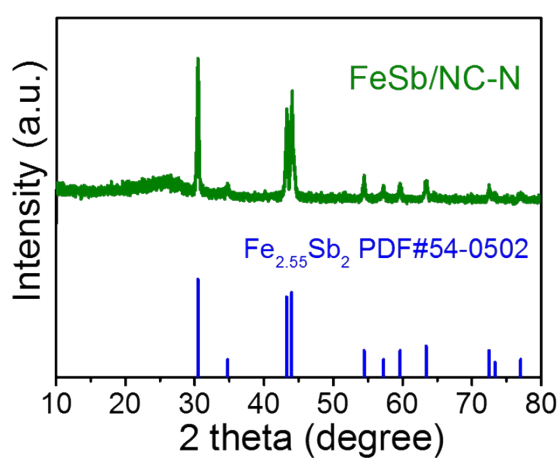

Fig. S2. XRD pattern of FeSb/NC-N catalyst.

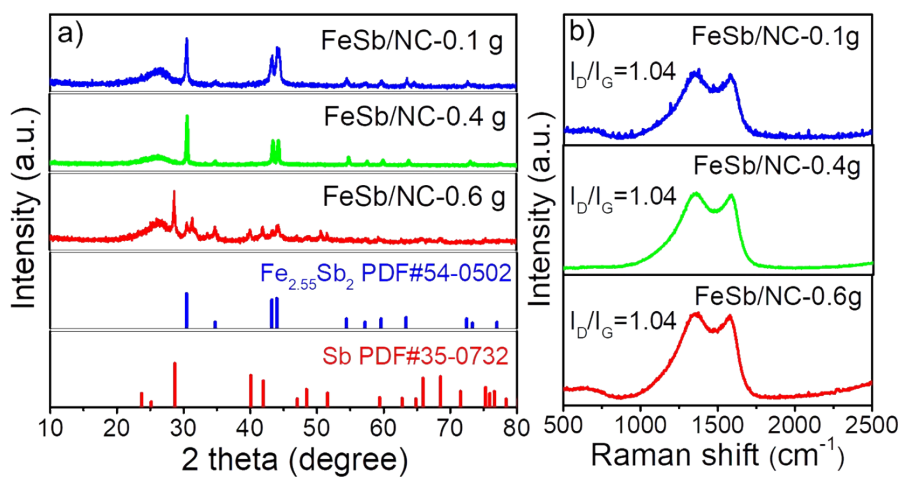

Fig. S3. a) XRD patterns and b) Raman spectra of FeSb/NC with different feeding amount of  $\text{SbCl}_3$ .

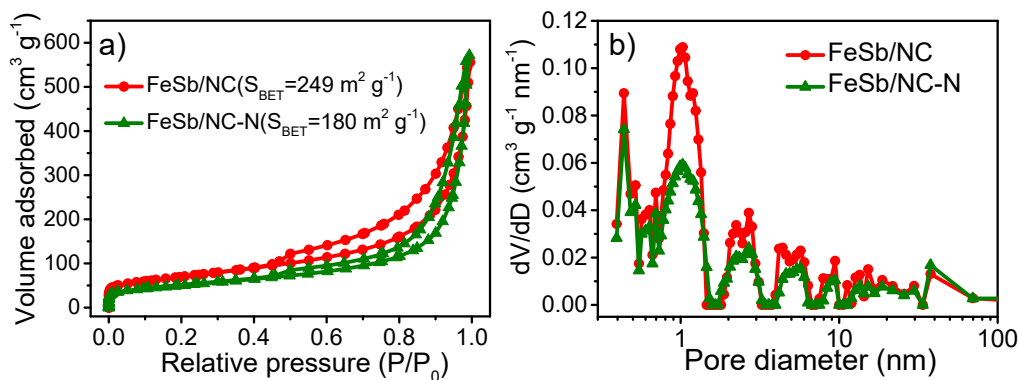

Fig. S4. a) N<sub>2</sub> adsorption-desorption isotherms and b) the corresponding pore size distribution curves of FeSb/NC and FeSb/NC-N catalysts.

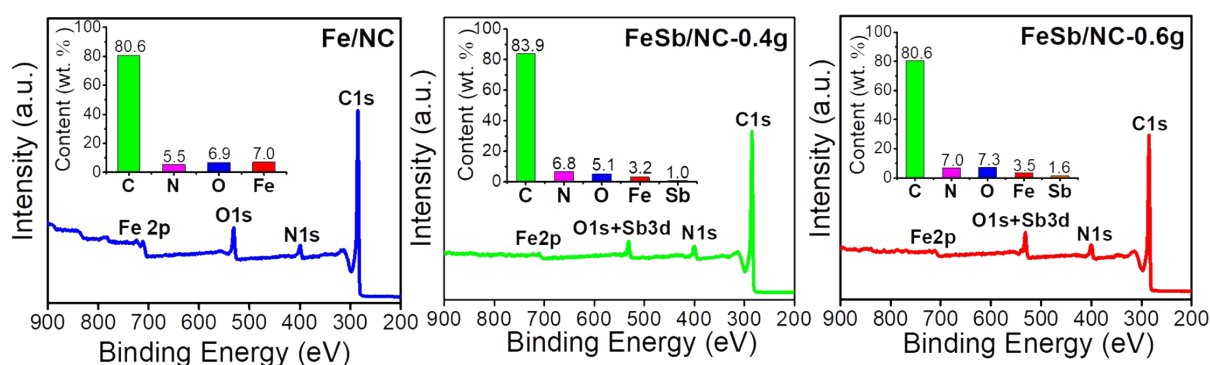

Fig. S5. The XPS survey spectra and the corresponding elemental contents of Fe/NC, FeSb/NC-0.4g and FeSb/NC-0.6g.

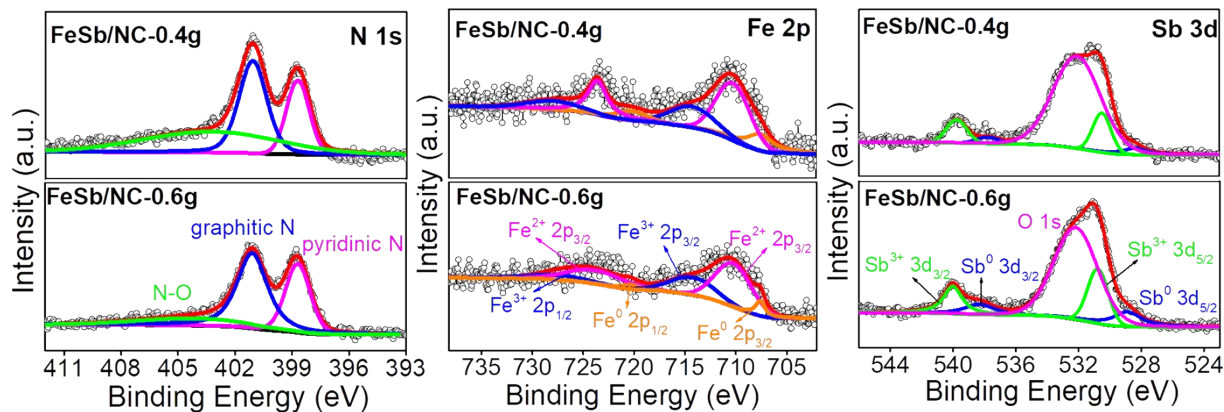

Fig. S6. High-resolution N 1s, Fe 2p and Sb 3d spectra of FeSb/NC-0.4g and FeSb/NC-0.6g.

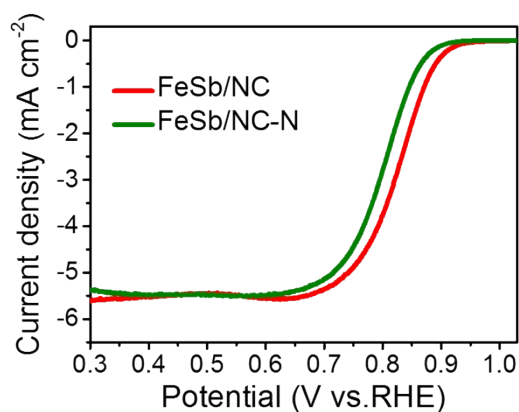

Fig. S7. LSV curves for ORR of FeSb/NC and FeSb/NC-N catalysts.

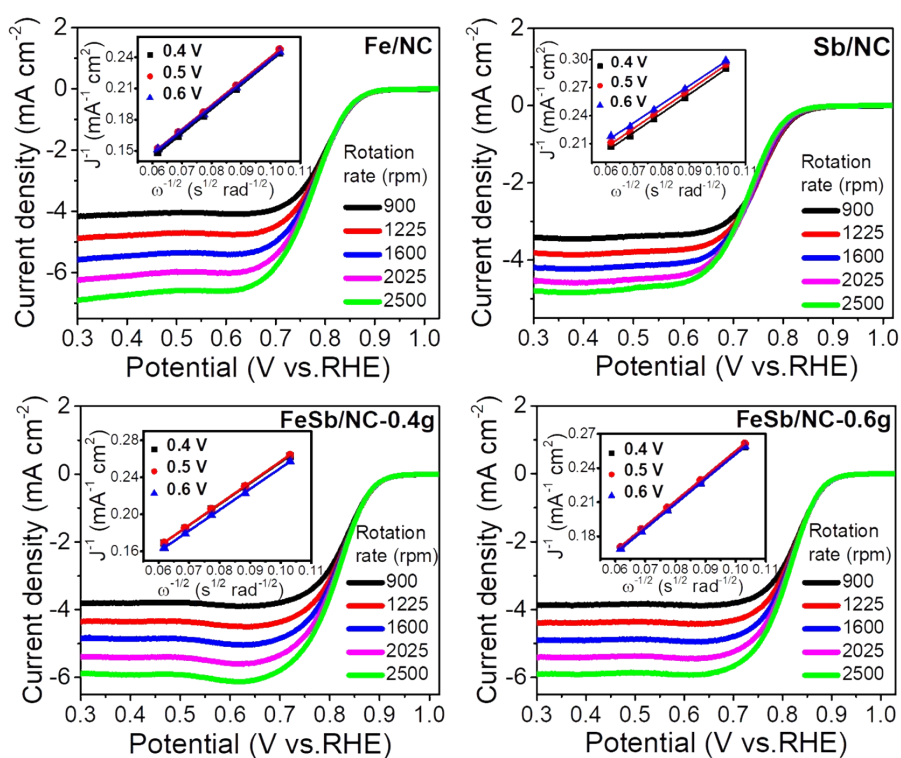

Fig. S8. LSV curves of Fe/NC, Sb/NC, FeSb/NC-0.4g and FeSb/NC-0.6g catalysts measured at different rotation rates and the corresponding K-L plots.

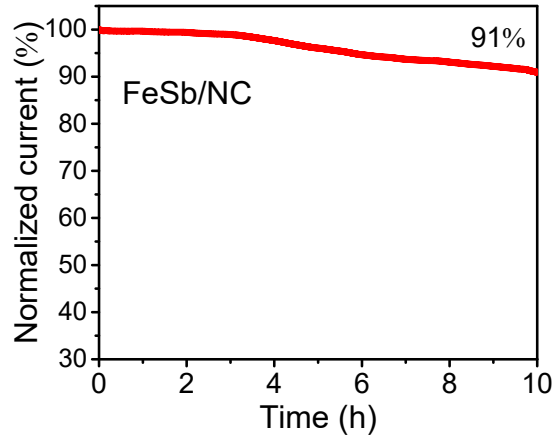

Fig. S9. ORR durability test of FeSb/NC performed on carbon paper.

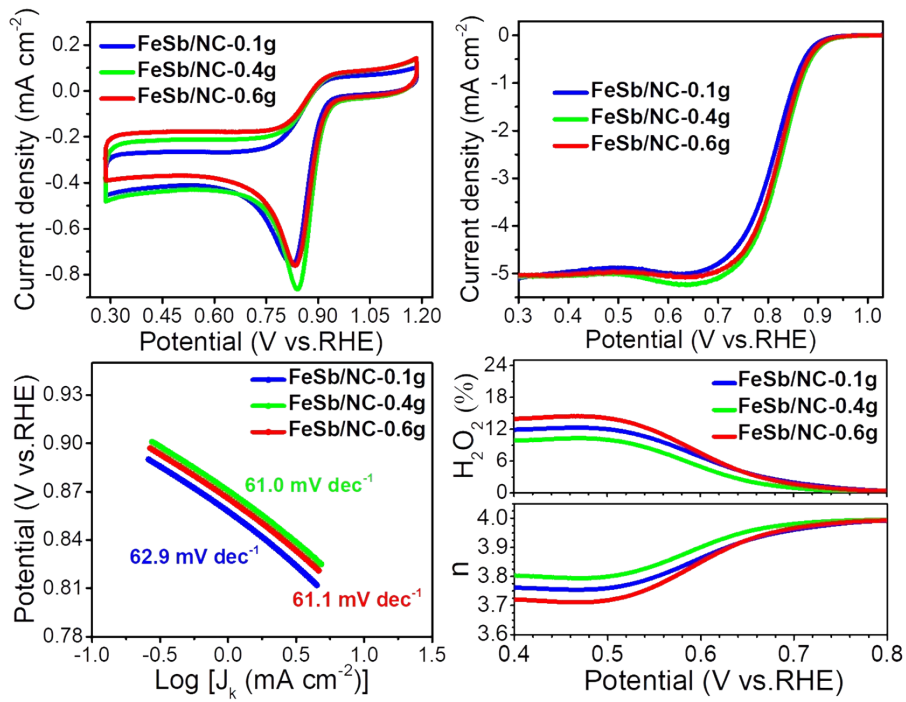

Fig. S10. ORR performance of FeSb/NC with different feeding amount of  $\text{SbCl}_3$ .

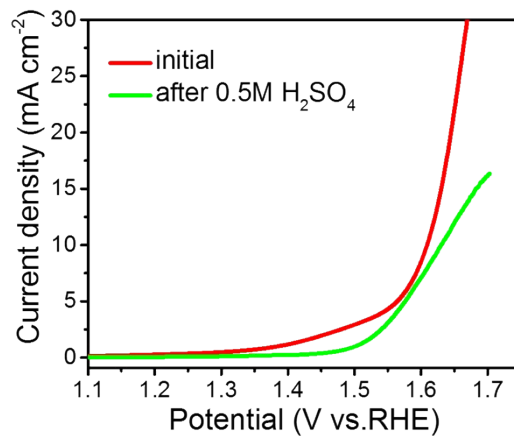

Fig. S11. OER LSV curves of FeSb/NC before and after acid leaching.

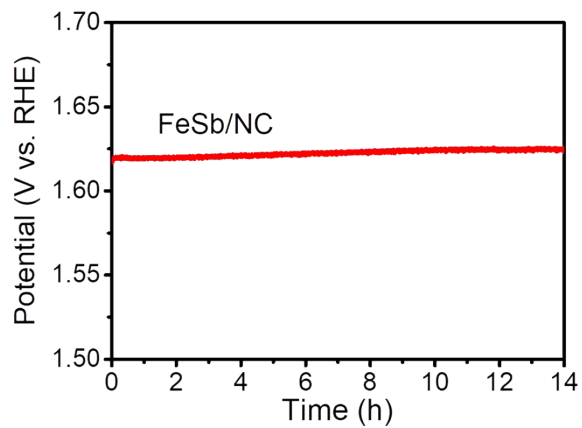

Fig. S12. Chronopotentiometric curve at a constant current density of  $10 \text{ mA cm}^{-2}$  for on FeSb/NC.

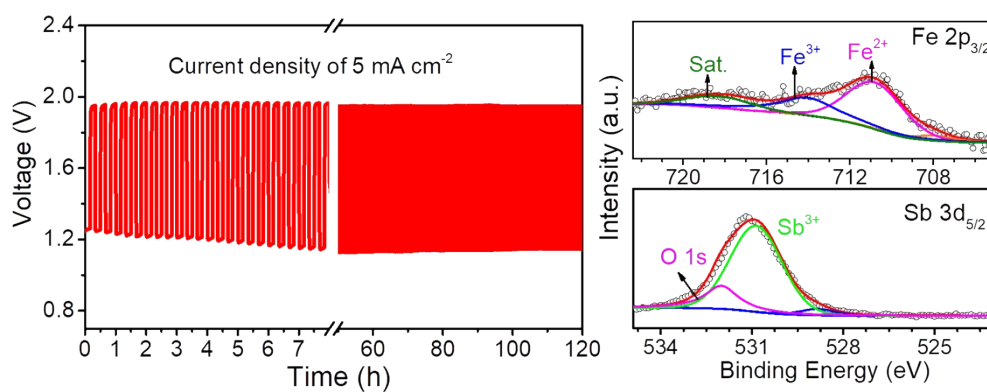

Fig. S13. High-resolution Fe 2p<sub>3/2</sub> and Sb 3d<sub>5/2</sub> spectra of FeSb/NC after 120 h of charge-discharge cycling test at  $5 \text{ mA cm}^{-2}$  for 120 h.

Table S1 ORR parameters for for FeSb/NC-0.1g, FeSb/NC-0.4g, FeSb/NC-0.6g.

| Samples      | Peak potential<br>(V vs. RHE) | $E_{\text{onset}}$<br>(V vs. RHE) | $E_{1/2}$<br>(V vs. RHE) | $J_L$<br>(mA cm <sup>-2</sup> ) | Tafel slope<br>(mV dec <sup>-1</sup> ) |
|--------------|-------------------------------|-----------------------------------|--------------------------|---------------------------------|----------------------------------------|
| FeSb/NC-0.1g | 0.82                          | 0.89                              | 0.81                     | 5.00                            | 62.9                                   |
| FeSb/NC-0.4g | 0.84                          | 0.90                              | 0.82                     | 5.24                            | 61.0                                   |
| FeSb/NC-0.6g | 0.83                          | 0.90                              | 0.82                     | 5.07                            | 61.1                                   |

Table S2 Comparison of Zn-air battery performance of the FeSb/NC catalyst with recently reported electrocatalysts.



| Catalysts                                             | OCV (V) | Peak power density (mW cm <sup>-2</sup> ) | Specific capacity (mA h g <sup>-1</sup> Zn) | Cycling durability @J(mA cm <sup>-2</sup> ) | Ref.      |
|-------------------------------------------------------|---------|-------------------------------------------|---------------------------------------------|---------------------------------------------|-----------|
| FeSb/NC                                               | 1.46    | 175                                       | 751                                         | 887 h @5<br>616 h @10                       | This work |
| N-CoS <sub>2</sub> YSSs                               | 1.41    | 81                                        | 744                                         | 165 h @10                                   | [1]       |
| FeNi <sub>3</sub> @NC                                 | 1.39    | 139                                       | 756                                         | 30 h @5                                     | [2]       |
| Co@hNCTs-800                                          | 1.45    | 149                                       | 746                                         | 500 h @5                                    | [3]       |
| Zn-Ni <sub>3</sub> FeN/NG                             | 1.60    | 158                                       | 650                                         | 180 h @10                                   | [4]       |
| Fe-enriched-FeNi <sub>3</sub> /NC                     | 1.43    | 89                                        | 734                                         | 14 h @10                                    | [5]       |
| CoSe <sub>2</sub> @NC                                 | 1.48    | 137                                       | 751                                         | 83 h @10                                    | [6]       |
| CoFe@NC/NC HNSs-700                                   | 1.49    | 184                                       | 774                                         | 50 h @5                                     | [7]       |
| Mn-RuO <sub>2</sub>                                   | 1.55    | 181                                       | 812                                         | 2500 h @10                                  | [8]       |
| Co <sub>6</sub> Mo <sub>6</sub> C <sub>2</sub> -Co@NC | 1.38    | 45                                        | 760                                         | 300 h @10                                   | [9]       |
| CoFe/S-N-C                                            | 1.48    | 130                                       | 814                                         | 100 h @10                                   | [10]      |
| NiCo/NHCS-TUC-3                                       | 1.59    | 256                                       | 757                                         | 70 h @5                                     | [11]      |
| CS350-10Ar                                            | 1.36    | 135                                       |                                             | 120 h @5                                    | [12]      |
| Co/NGC-3                                              |         | 134                                       | 716                                         | 120 h @5                                    | [13]      |
| FeCo/Co <sub>2</sub> P@NPCF                           | 1.44    | 154                                       |                                             | 107 h @10                                   | [14]      |
| MnSAC                                                 |         | 258                                       | 675                                         | 100 h @5                                    | [15]      |
| Co <sub>9</sub> S <sub>8</sub> @Co/Mn-S,N-PC          | 1.49    | 80                                        |                                             | 210 h @10                                   | [16]      |
| CoFe-NCNFs                                            | 1.52    | 116                                       |                                             | 110 h @5                                    | [17]      |
| Fe-NC SAC                                             |         | 180                                       | 786                                         | 160 cycles @20                              | [18]      |
| FeCo/Se-CNT                                           | 1.54    | 173                                       |                                             | 70 h @5                                     | [19]      |
| FeCu <sub>0.3</sub> -N/C                              | 1.50    | 111                                       | 682                                         | 75 h @5                                     | [20]      |
| NiFe <sub>3</sub> @NGHS-NCNT <sub>s</sub>             | 1.51    | 127                                       |                                             | 166 h @10                                   | [21]      |
| f-FeCo-CNT                                            | 1.48    | 196                                       | 754                                         | 180 h @20                                   | [22]      |
| Catalysts                                             | OCV (V) | Peak power density (mW cm <sup>-2</sup> ) | Specific capacity (mA h g <sup>-1</sup> Zn) | Cycling durability @J(mA cm <sup>-2</sup> ) | Ref.      |

|                                                    |      |     |     |           |      |
|----------------------------------------------------|------|-----|-----|-----------|------|
| <b>CoSb/NC-0.8</b>                                 | 1.42 | 180 |     | 160 h @10 | [23] |
| <b>CoSb<sub>3</sub>/NCL-30</b>                     |      | 211 |     | 60 h @10  | [24] |
| <b>S-LaCoO<sub>3</sub></b>                         | 1.47 | 92  | 747 | 100 h @2  | [32] |
| <b>LSCP-3</b>                                      | 1.50 | 52  | 740 | 60 h @10  | [33] |
| <b>Pb<sub>2</sub>Ru<sub>2</sub>O<sub>6.5</sub></b> |      | 195 |     | 33 h @10  | [34] |
| <b>YRO</b>                                         | 1.17 | 145 |     | 34 h @10  | [35] |

Table S3 Comparison of BI and SBI values of FeSb/NC catalyst with recently reported electrocatalysts.

| <b>Catalysts</b>                                                                                  | <b>ORR (V)<br/>@-3 mA/cm<sup>2</sup><sub>geo</sub></b> | <b>OER (V)<br/>@10 mA/cm<sup>2</sup><sub>geo</sub></b> | <b>BI (V)</b> | <b>SBI<br/>(uA/cm<sup>2</sup><sub>BET</sub>)</b> | <b>Ref.</b>      |
|---------------------------------------------------------------------------------------------------|--------------------------------------------------------|--------------------------------------------------------|---------------|--------------------------------------------------|------------------|
| <b>FeSb/NC</b>                                                                                    | <b>0.82</b>                                            | <b>1.72</b>                                            | <b>0.90</b>   | <b>4.9</b>                                       | <b>This work</b> |
| <b>Co<sub>9</sub>S<sub>8</sub>/(N,S-doped carbon)</b>                                             | 0.84                                                   | 1.64                                                   | 0.80          | 1.3                                              | [25]             |
| <b>N-doped CNT framework</b>                                                                      | 0.83                                                   | 1.60                                                   | 0.77          | 6.8                                              | [26]             |
| <b>N,P-doped C foam</b>                                                                           | 0.80                                                   | 1.90                                                   | 1.10          | 0.8                                              | [27]             |
| <b>Ba<sub>0.5</sub>Sr<sub>0.5</sub>Co<sub>0.8</sub>F<sub>e<sub>0.2</sub>O<sub>3-δ</sub></sub></b> | 0.74                                                   | 1.58                                                   | 0.84          | 2.7                                              | [28]             |
| <b>α-MnO<sub>2</sub></b>                                                                          | 0.76                                                   | 1.72                                                   | 0.96          | 14.7                                             | [29]             |
| <b>Co<sub>x</sub>Mn<sub>3-x</sub>O<sub>4</sub>/C</b>                                              | 0.82                                                   | 1.80                                                   | 0.98          | 92.6                                             | [30]             |
| <b>Pb<sub>2</sub>Ru<sub>2</sub>O<sub>7-x</sub></b>                                                | 0.74                                                   | 1.43                                                   | 0.69          | 274.0                                            | [31]             |

## References

- [1] X. F. Lu, S. L. Zhang, E. B. Shangguan, P. Zhang, S. Y. Gao, X. W. Lou, *Adv. Sci.* 7 (2020) 2001178.
- [2] D. Chen, J. W. Zhu, X. Q. Mu, R. L. Cheng, W. Q. Li, S. L. Liu, Z. H. Pu, C. Lin, S. C. Mu, *Appl. Catal. B Environ.* 268 (2020), 118729.
- [3] Q. Y. Zhou, Z. Zhang, J. J. Cai, B. Liu, Y. L. Zhang, X. F. Gong, X. L. Sui, A. P. Yu, L. Zhao, Z. B. Wang, Z. W. Chen, *Nano Energy* 71 (2020), 104592.
- [4] X. Y. He, Y. H. Tian, Z. L. Huang, L. Xu, J. C. Wu, J. C. Qian, J. M. Zhang, H. N. Li, *J. Mater. Chem. A* 9 (2021) 2301.
- [5] K. Chen, S. Kim, R. Rajendiran, K. Prabakar, G. Z. Li, Z. C. Shi, C. Jeong, J. Kang, O. L. Li, *J. Colloid Interface Sci.* 582 (2021) 977-990.
- [6] K. X. Ding, J. G. Hu, J. Luo, W. Jin, L. M. Zhao, L. R. Zheng, W. S. Yan, B. C. Weng, H. S. Hou, X. B. Ji, *Nano Energy* 91 (2022), 106675.
- [7] S. J. Wang, H. Y. Wang, C. Q. Huang, P. C. Ye, X. T. Luo, J. Q. Ning, Y. J. Zhong, Y. Hu, *Appl. Catal. B Environ.* 298 (2021), 120512.
- [8] C. H. Zhou, X. Chen, S. Liu, Y. Han, H. B. Meng, Q. Y. Jiang, S. M. Zhao, F. Wei, J. Sun, T. Tan, R. F. Zhang, *J. Am. Chem. Soc.* 144 (2022) 2694-2704.
- [9] Y. Q. Li, Z. H. Yin, M. Cui, S. R. Chen, T. L. Ma, *Mater. Today Energy* 18 (2020), 100565.
- [10] G. J. Li, Y. B. Tang, T. T. Fu, Y. Xiang, Z. P. Xiong, Y. J. Si, C. Z. Guo, Z. Q. Jiang, *Chem. Eng. J.* 429 (2022), 132174.
- [11] K. Sheng, Q. F. Yi, A-L. Chen, Y. B. Wang, Y. H. Yan, H. D. Nie, X. L. Zhou, *ACS Appl. Mater. Interfaces* 13 (2021) 45394-45405.
- [12] B. Li, H. G. Xue, H. Pang, Q. Xu, *Sci. China Chem.* 63 (2020) 475-482.
- [13] J. M. Li, Y. M. Kang, D. Liu, Z. Q. Lei, P. Liu, *ACS Appl. Mater. Interfaces* 12 (2020) 5717-5729.
- [14] Q. Shi, Q. Liu, Y. Ma, Z. Fang, Z. Liang, G. Shao, B. Tang, W. Y. Yang, L. Qin, X. S. Fang, *Adv. Energy Mater.* 10 (2020) 1903854.
- [15] H. S. Shang, W. M. Sun, R. Sui, J. J. Pei, L. R. Zheng, J. C. Dong, Z. L. Jiang, D. N. Zhou, Z. B. Zhuang, W. X. Chen, J. T. Zhang, D. S. Wang, Y. D. Li, *Nano Lett.* 20 (2020) 5443-5450.
- [16] R.-M. Sun, L. Zhang, J.-J. Feng, K.-M. Fang, A.-J. Wang, *J. Colloid Interface Sci.* 608 (2022) 2100-2110.
- [17] S.-Y. Lin, Y.-P. Chen, Y. Cao, L. Zhang, J.-J. Feng, A.-J. Wang, *J. Power Sources* 521 (2022), 230926.
- [18] C. Du, Y. J. Gao, J. G. Wang, W. Chen, *J. Mater. Chem. A* 8 (2020) 9981.
- [19] H. W. Zhang, M. Q. Zhao, H. R. Liu, S. R. Shi, Z. H. Wang, B. Zhang, L. Song, J. Z. Shang, Y. Yang, C. Ma, L. R. Zheng, Y. H. Han, W. Huang, *Nano Lett.* 21 (2021) 2255-2264.

- [20] B. Wang, L. Xu, G. P. Liu, Y. Z. Ye, Y. Quan, C. T. Wang, W. X. Wei, W. S. Zhu, C. X. Xu, H. M. Li, J. X. Xia, *J. Alloys Compd.* 826 (2020), 154152.
- [21] Y. F. Ma, W. H. Chen, Z. Q. Jiang, X. N. Tian, X. Y. WangGuo, G. L. Chen, Z.-J. Jiang, *J. Mater. Chem. A* (2022), Accepted Manuscript.
- [22] Y. Y. Wang, A. Kumar, M. Ma, Y. Jia, Y. Wang, Y. Zhang, G. X. Zhang, X. M. Sun, Z. F. Yan, *Nano Res.* 13 (2020) 1090-1099.
- [23] T. Gong, P. P. Sun, X. Xie, D. Zhang, Y. A. Wei, B. Li, N. Huang, L. Fang, X. W. Lv, X. H. Sun, *Appl. Surf. Sci.* 562 (2021), 150112.
- [24] T.-B. Yang, K.-Y. Zhou, G.-Y. Chen, W.-X. Zhang, J.-C. Liang, *RSC Adv.* 7 (2017), 33012.
- [25] Z.-Q. Cao, M.-Z. Wu, H.-B. Hu, G.-J. Liang, C.-Y. Zhi, *NPG Asia Mater.* 10 (2018) 670-684.
- [26] B. Y. Xia, Y. Yan, N. Li, H. B. Wu, X. W. Lou, X. Wang, *Nat. Energy* 1 (2016), 15006.
- [27] J. T. Zhang, Z. H. Zhao, Z. H. Xia, L. M. Dai, *Nat. Nanotechnol.* 10 (2015), 444.
- [28] J. Wang, H. Zhao, Y. Gao, D. J. Chen, C. Chen, M. Saccoccio, F. Ciucci, *Int. J. Hydrogen Energy* 41 (2016) 10744-10754.
- [29] Y. T. Meng, W. Q. Song, H. Huang, Z. Ren, S.-Y. Chen, S. L. Suib, *J. Am. Chem. Soc.* 136 (2014) 11452-11464.
- [30] C. Li, X. P. Han, F. Y. Cheng, Y. X. Hu, C. C. Chen, J. Chen, *Nat. Commun.* 6 (2015), 7345.
- [31] P. Gayen, S. Saha, K. Bhattacharyya, V. K. Ramani, *ACS Catal.* 10 (2020) 7734-7746.
- [32] J. Q. Ran, T. T. Wang, J. Y. Zhang, C. L. Xu, Y. G. Liu, S. B. Xi, D. Q. Gao, *Chem. Mater.* 32 (2020) 3439-3446.
- [33] R. Majee, T. Das, S. Chakraborty, S. Bhattacharyya, *ACS Appl. Mater. Interfaces* 12 (2020) 40355-40363.
- [34] J. Park, M. Risch, G. Nam, M. Park, T. J. Shin, S. Park, M. G. Kim, Y. Shao-Horn, J. Cho, *Energy Environ. Sci.* 10 (2017) 129-136.
- [35] J. Park, M. Park, G. Nam, M.-G. Kim, J. Cho, *Nano Lett.* 17 (2017) 3974-3981.
